# Supplementary material
Source: Research Square preprint supplement (doi:10.21203/rs.3.rs-9085623/v1)
Supplement: Supplementary file 1 [file 9f9f09552c1e62c1aecb9150.docx]

**Supplementary materials**

**Not all heads are the same: species- and sex-specific differences in eye and postocular area morphology of burying beetles (*Nicrophorus* spp.)**

Daria Bajerlein1, Julian Katzke2, Edward Baraniak3, Arkadiusz Urbański4*

1 Department of Animal Taxonomy and Ecology, Faculty of Biology, Adam Mickiewicz University, Poznań, Poland,

2 Okinawa Institute of Science and Technology

3 Department of Systematic Zoology, Faculty of Biology, Adam Mickiewicz University, Poznań, Poland

4 Department of Animal Physiology and Developmental Biology, Adam Mickiewicz University, Poznań, Poland


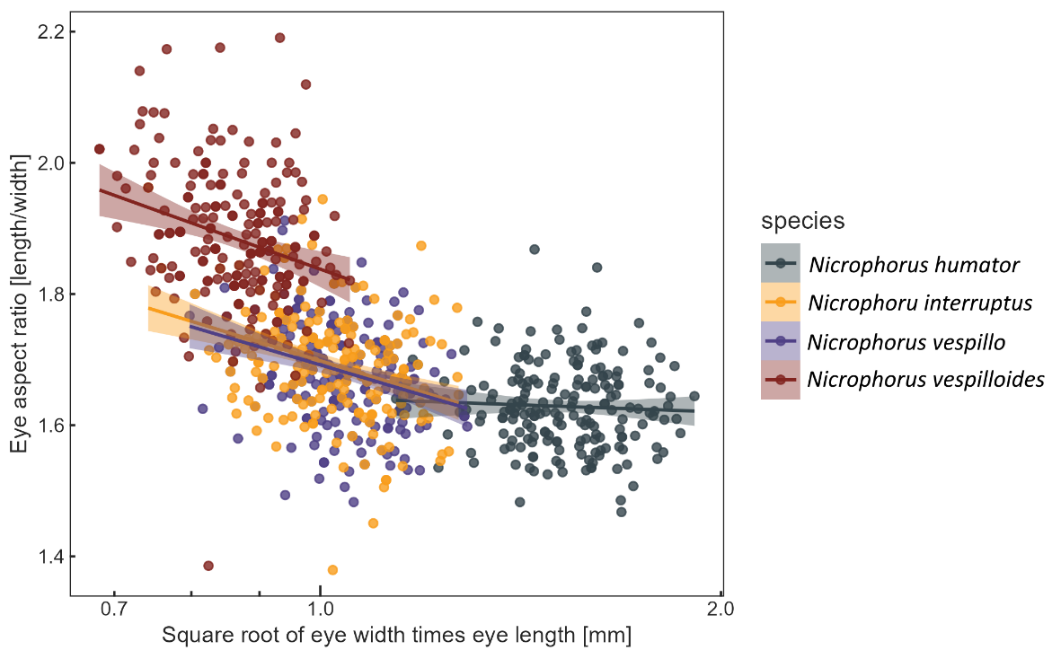
**Tab S1.** Summary of the linear regression model estimating the effect of log-transformed left eye length on the log-transformed left eye width. Based on the combine data from four burying beetles species (*Nicrophorus* spp.). *** *p* ≤ 0.001.

|  |  |  |  |  |  |  |  |  |  |
| --- | --- | --- | --- | --- | --- | --- | --- | --- | --- |
|  |  |  |  |  |  |  |  |  |  |
|  |  | **Term** | **Estimate** | **Std. Error** | **t value** | ***p* value** | **Significance** |  |  |
|  |  | Intercept | 0.503 | 0.002 | 218.8 | <2e-16 | *** |  |  |
|  |  | log_left eye width | 0.797 | 0.007 | 109.9 | <2e-16 | *** |  |  |
|  |  |  |  |  |  |  |  |  |  |

**Fig. S1.** Allometric relationships between eye aspect ratio (length/width) and eye square root (width x length) in four burying beetles species (*Nicrophorus* spp.). Lines represent ordinary least squares regression models based on log–log transformed data, with 95% confidence intervals.

**Tab. S2.** Summary of the linear regression model estimating the effect of log-transformed left eye length on the log-transformed left eye width in four different *Nicrophorus* species (*Nicrophorus humator, Nicrophorus interruptus, Nicrophorus vespillo* and *Nicrophorus vespilloides*). ** *p* ≤ 0.01; *** *p* ≤ 0.001.

|  |  |  |  |  |  |  |  |  |  |
| --- | --- | --- | --- | --- | --- | --- | --- | --- | --- |
|  |  |  |  |  |  |  |  |  |  |
|  |  | **Term** | **Estimate** | **Std. Error** | **t value** | ***p* value** | **Significance** |  |  |
|  |  | (Intercept) | 0,504 | 0,006 | 81,365 | < 2e-16 | *** |  |  |
|  |  | log_left eye width (*Nicrophorus humator*) | 0,907 | 0,030 | 30,090 | < 2e-16 | *** |  |  |
|  |  | species*Nicrophorus interruptus* | -0,033 | 0,009 | -3,447 | 0,001 | *** |  |  |
|  |  | species*Nicrophorus vespillo* | -0,038 | 0,010 | -3,933 | 0,000 | *** |  |  |
|  |  | species*Nicrophorus vespilloides* | -0,004 | 0,016 | -0,239 | 0,811 |  |  |  |
|  |  | log_left eye width:species*Nicrophorus interruptus* | -0,129 | 0,040 | -3,245 | 0,001 | ** |  |  |
|  |  | log_left eye width:species*Nicrophorus vespillo* | -0,147 | 0,043 | -3,444 | 0,001 | *** |  |  |
|  |  | log_left eye width:species*Nicrophorus vespilloides* | -0,193 | 0,043 | -4,494 | 8,06E-06 | *** |  |  |
|  |  |  |  |  |  |  |  |  |  |
|  |  |  |  |  |  |  |  |  |  |

**Tab S3**. Summary of the linear regression model estimating the effect of log-transformed different morphological parameters associated with eye morphology on log-transformed pronotum width in four different burying beetles species (*Nicrophorus humator, Nicrophorus interruptus, Nicrophorus vespillo* and *Nicrophorus vespilloides*). * *p* ≤ 0.05; *** *p* ≤ 0.001.

|  |  |  |  |  |  |  |  |  |  |
| --- | --- | --- | --- | --- | --- | --- | --- | --- | --- |
|  |  |  |  |  |  |  |  |  |  |
|  |  | **Term** | **Estimate** | **Std, Error** | **t value** | **p value** | **Significance** |  |  |
|  |  | **eye length vs pronotum width** |  |  |  |  |  |  |  |
|  |  | (Intercept) | -0,919 | 0,042 | -21,906 | < 2e-16 | *** |  |  |
|  |  | log_pronotum width (*Nicrophorus humator*) | 0,827 | 0,022 | 37,829 | < 2e-16 | *** |  |  |
|  |  | species*Nicrophorus interruptus* | -0,360 | 0,059 | -6,064 | 2,06E-09 | *** |  |  |
|  |  | species*Nicrophorus vespillo* | -0,268 | 0,063 | -4,272 | 0,0000217 | *** |  |  |
|  |  | species*Nicrophorus vespilloides* | -0,272 | 0,060 | -4,515 | 7,31E-06 | *** |  |  |
|  |  | log_pronotum width:species*Nicrophorus interruptus* | 0,080 | 0,033 | 2,443 | 0,0148 | * |  |  |
|  |  | log_pronotum width:species*Nicrophorus vespillo* | -0,009 | 0,034 | -0,266 | 0,7906 |  |  |  |
|  |  | log_pronotum width:species*Nicrophorus vespilloides* | 0,054 | 0,035 | 1,508 | 0,132 |  |  |  |
|  |  | **eye width vs pronotum width** |  |  |  |  |  |  |  |
|  |  | (Intercept) | -1,373 | 0,060 | -23,059 | < 2e-16 | *** |  |  |
|  |  | log_pronotum width (*Nicrophorus humator*) | 0,810 | 0,031 | 26,102 | < 2e-16 | *** |  |  |
|  |  | species*Nicrophorus interruptus* | -0,672 | 0,084 | -7,976 | 5,36E-15 | *** |  |  |
|  |  | species*Nicrophorus vespillo* | -0,436 | 0,089 | -4,901 | 1,16E-06 | *** |  |  |
|  |  | species*Nicrophorus vespilloides* | -0,530 | 0,086 | -6,193 | 9,52E-10 | *** |  |  |
|  |  | log_pronotum width:species*Nicrophorus interruptus* | 0,237 | 0,046 | 5,098 | 4,31E-07 | *** |  |  |
|  |  | log_pronotum width:species*Nicrophorus vespillo* | 0,065 | 0,048 | 1,363 | 0,1731 |  |  |  |
|  |  | log_pronotum width:species*Nicrophorus vespilloides* | 0,122 | 0,050 | 2,425 | 0,0155 | * |  |  |
|  |  | **eye aspect ratio (length/width) vs pronotum width** |  |  |  |  |  |  |  |
|  |  | (Intercept) | 1,574 | 0,100 | 15,731 | < 2e-16 | *** |  |  |
|  |  | log_pronotum width (*Nicrophorus humator*) | 0,029 | 0,052 | 0,547 | 0,585 |  |  |  |
|  |  | species*Nicrophorus interruptus* | 0,526 | 0,142 | 3,718 | 0,000 | *** |  |  |
|  |  | species*Nicrophorus vespillo* | 0,290 | 0,150 | 1,939 | 0,053 |  |  |  |
|  |  | species*Nicrophorus vespilloides* | 0,467 | 0,144 | 3,248 | 0,001 | ** |  |  |
|  |  | log_pronotum width:species*Nicrophorus interruptus* | -0,265 | 0,078 | -3,393 | 0,001 | *** |  |  |
|  |  | log_pronotum width:species*Nicrophorus vespillo* | -0,129 | 0,080 | -1,603 | 0,109 |  |  |  |
|  |  | log_pronotum width:species*Nicrophorus vespilloides* | -0,130 | 0,085 | -1,533 | 0,126 |  |  |  |
|  |  |  |  |  |  |  |  |  |  |
|  |  |  |  |  |  |  |  |  |  |


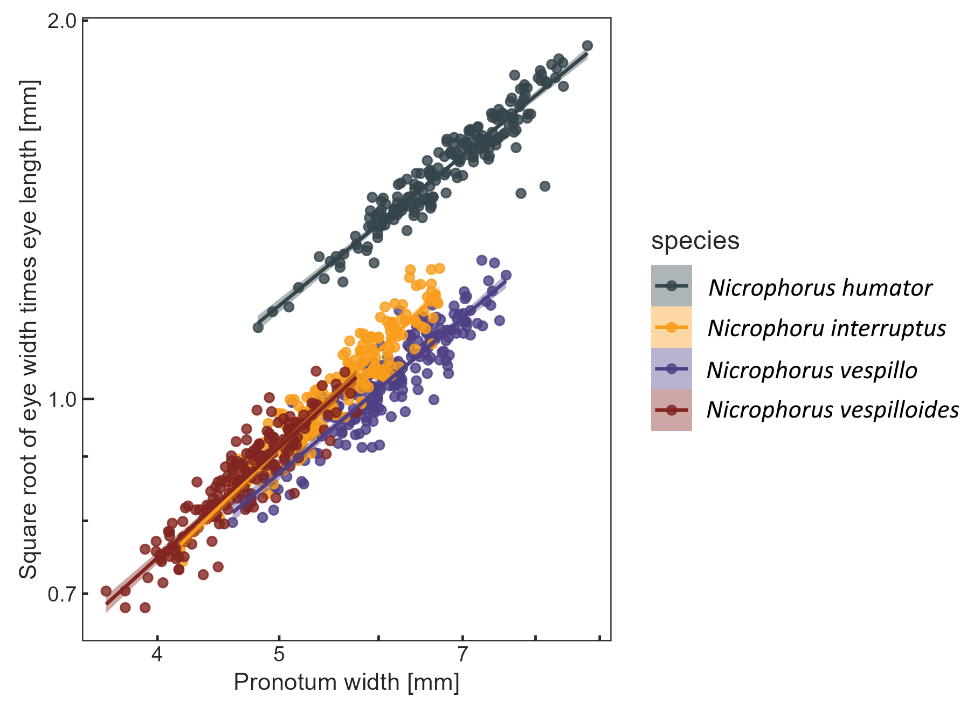
**Fig S2.** Correlations betweensquare root of eye (width x length) and pronotum width in four *Nicrophorus* species.Lines represent ordinary least squares regression models based on log–log transformed data, with 95% confidence intervals.

**Table S4.** Summary of ANOVA analysis performed for chosen morphological parameters in terms of analysis of differences between species and sexes. ** *p* ≤ 0.01; *** *p* ≤ 0.001

|  |  |  |  |  |  |  |  |  |  |  |
| --- | --- | --- | --- | --- | --- | --- | --- | --- | --- | --- |
|  |  |  |  |  |  |  |  |  |  |  |
|  |  | **Term** | **Df** | **Sum Sq** | **Mean Sq** | **F value** | ***p* value** | **Significance** |  |  |
|  |  | **pronotum width** |  |  |  |  |  |  |  |  |
|  |  | species | 3 | 14.845 | 4.948 | 488.431 | < 2e-16 | *** |  |  |
|  |  | beetle sex | 1 | 0.007 | 0.007 | 0.712 | 0.399 |  |  |  |
|  |  | species:beetle sex | 3 | 0.160 | 0.053 | 5.275 | 0.001 | ** |  |  |
|  |  | **square root of eye (width x length)** |  |  |  |  |  |  |  |  |
|  |  | species | 3 | 34.458 | 11.486 | 1269.151 | < 2.2e-16 | *** |  |  |
|  |  | beetle sex | 1 | 0.027 | 0.027 | 3.016 | 0.083 |  |  |  |
|  |  | species:beetle sex | 3 | 0.230 | 0.077 | 8.461 | 1.548e-05 | *** |  |  |
|  |  | **eye width** |  |  |  |  |  |  |  |  |
|  |  | species | 3 | 42.417 | 14.139 | 1301.263 | < 2.2e-16 | *** |  |  |
|  |  | beetle sex | 1 | 0.028 | 0.028 | 2.597 | 0.107475 |  |  |  |
|  |  | species:beetle sex | 3 | 0.174 | 0.058 | 5.337 | 0.001211 | ** |  |  |
|  |  | **eye length** |  |  |  |  |  |  |  |  |
|  |  | species | 3 | 27.679 | 9.226 | 1096.929 | < 2.2e-16 | *** |  |  |
|  |  | beetle sex | 1 | 0.026 | 0.026 | 3.138 | 0.077 |  |  |  |
|  |  | species:beetle sex | 3 | 0.299 | 0.100 | 11.861 | 1.329e-07 | *** |  |  |
|  |  |  |  |  |  |  |  |  |  |  |
|  |  |  |  |  |  |  |  |  |  |  |

**Table S5**. Summary of the linear regression model estimating the effect of eye aspect ratio (length/width) with pronotum size in females and males of different burying beetles species (*Nicrophorus humator*, *Nicrophorus interruptus*, *Nicrophorus vespillo* and *Nicrophorus vespilloides*). F -females, M – males; *** *p* ≤ 0.001.

|  |  |  |  |  |  |  |  |  |  |
| --- | --- | --- | --- | --- | --- | --- | --- | --- | --- |
|  |  |  |  |  |  |  |  |  |  |
|  |  | **Term** | **Estimate** | **Std. Error** | **t value** | ***p* value** | **Significance** |  |  |
|  |  | ***Nicrophorus humator*** |  |  |  |  |  |  |  |
|  |  | (Intercept) | 1,651 | 0,115 | 14,411 | <2e-16 | ******* |  |  |
|  |  | log_pronotum width (F) | -0,018 | 0,060 | -0,300 | 0,764 |  |  |  |
|  |  | beetle sex M | -0,096 | 0,153 | -0,629 | 0,530 |  |  |  |
|  |  | log_pronotum width:beetle sex M | 0,063 | 0,080 | 0,787 | 0,432 |  |  |  |
|  |  | ***Nicrophorus interruptus*** |  |  |  |  |  |  |  |
|  |  | (Intercept) | 2,175 | 0,142 | 15,269 | <2e-16 | *** |  |  |
|  |  | log_pronotum width (F) | -0,285 | 0,084 | -3,403 | 0,001 | *** |  |  |
|  |  | beetle sex M | -0,094 | 0,198 | -0,476 | 0,635 |  |  |  |
|  |  | log_pronotum width:beetle sex M | 0,064 | 0,115 | 0,555 | 0,579 |  |  |  |
|  |  | ***Nicrophorus vespillo*** |  |  |  |  |  |  |  |
|  |  | (Intercept) | 2,000 | 0,165 | 12,138 | <2e-16 | *** |  |  |
|  |  | log_pronotum width (F) | -0,165 | 0,090 | -1,840 | 0,067 |  |  |  |
|  |  | beetle sex M | -0,140 | 0,217 | -0,644 | 0,520 |  |  |  |
|  |  | log_pronotum width:beetle sex M | 0,058 | 0,119 | 0,484 | 0,629 |  |  |  |
|  |  | ***Nicrophorus vespilloides*** |  |  |  |  |  |  |  |
|  |  | (Intercept) | 1,822 | 0,179 | 10,173 | <2e-16 | *** |  |  |
|  |  | log_pronotum width (F) | 0,041 | 0,116 | 0,352 | 0,725 |  |  |  |
|  |  | beetle sex M | 0,445 | 0,255 | 1,744 | 0,083 |  |  |  |
|  |  | log_pronotum width:beetle sex M | -0,290 | 0,165 | -1,757 | 0,081 |  |  |  |
|  |  |  |  |  |  |  |  |  |  |
|  |  |  |  |  |  |  |  |  |  |


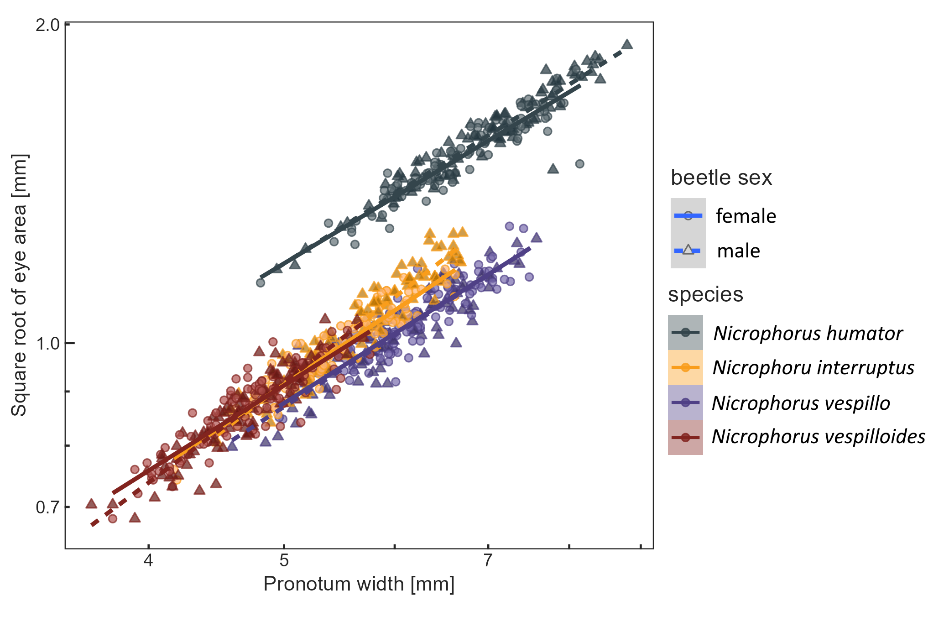


**Fig. S3.** Allometric relationships between square root of eye area (length x width) and pronotum width in males and females of different burying beetle species. Lines represent ordinary least squares regression models based on log–log transformed data, with 95% confidence intervals. Solid lines with circles represent females, and dashed lines with triangles represent males.


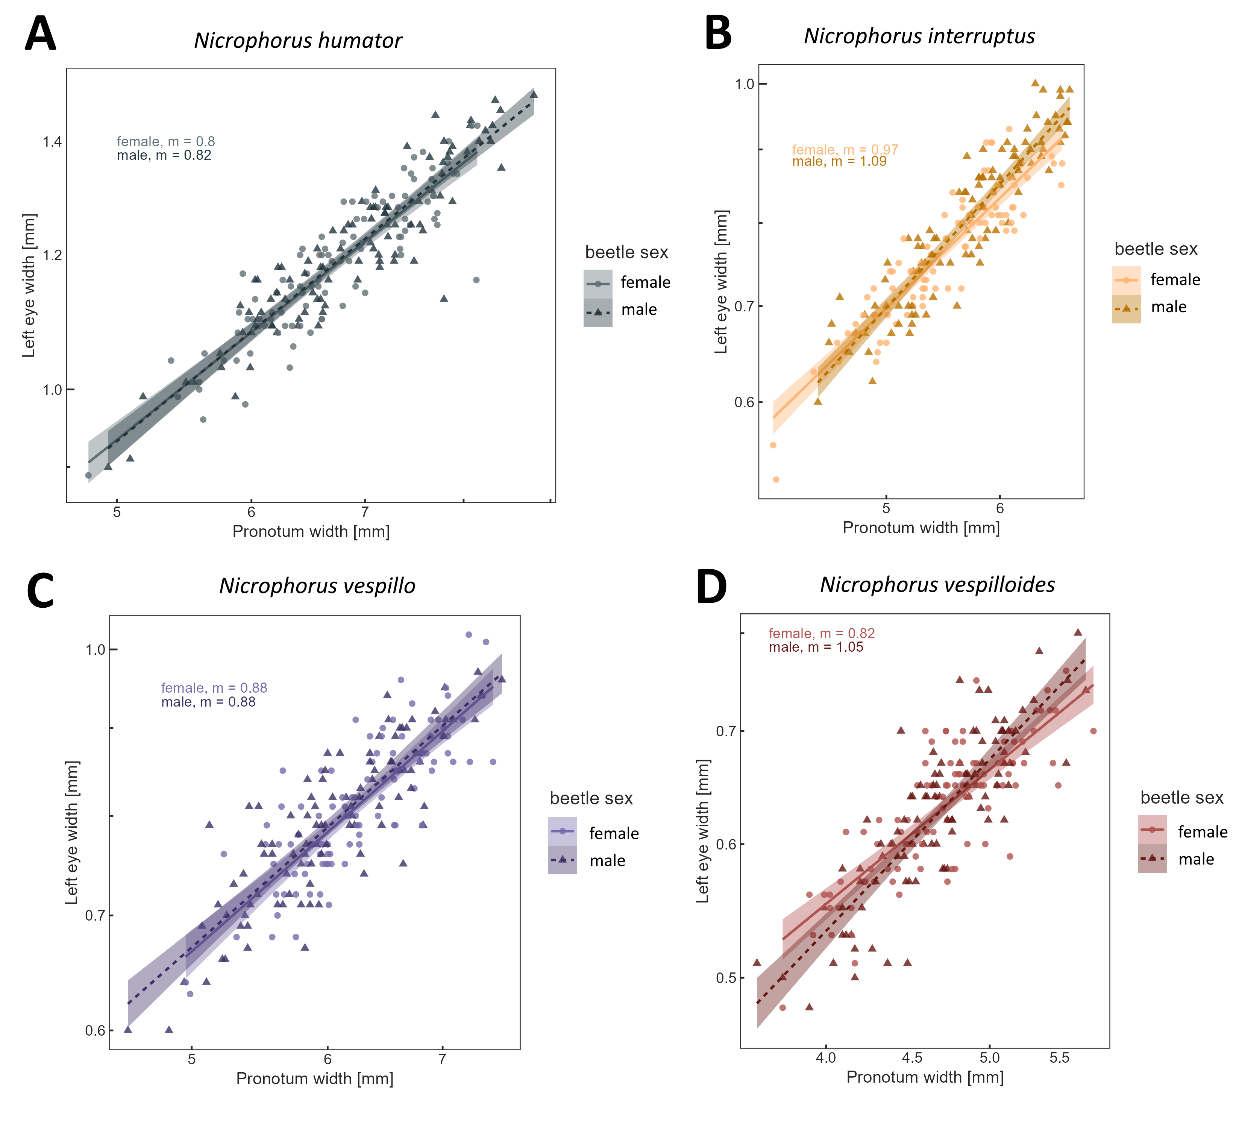
**Fig. S4.** Allometric relationships between log transformed eye width and pronotum width in males and females of different burying beetle species. Lines represent ordinary least squares regression models based on log–log transformed data, with 95% confidence intervals. The slope value for these two variables is shown in the upper left corner.

**
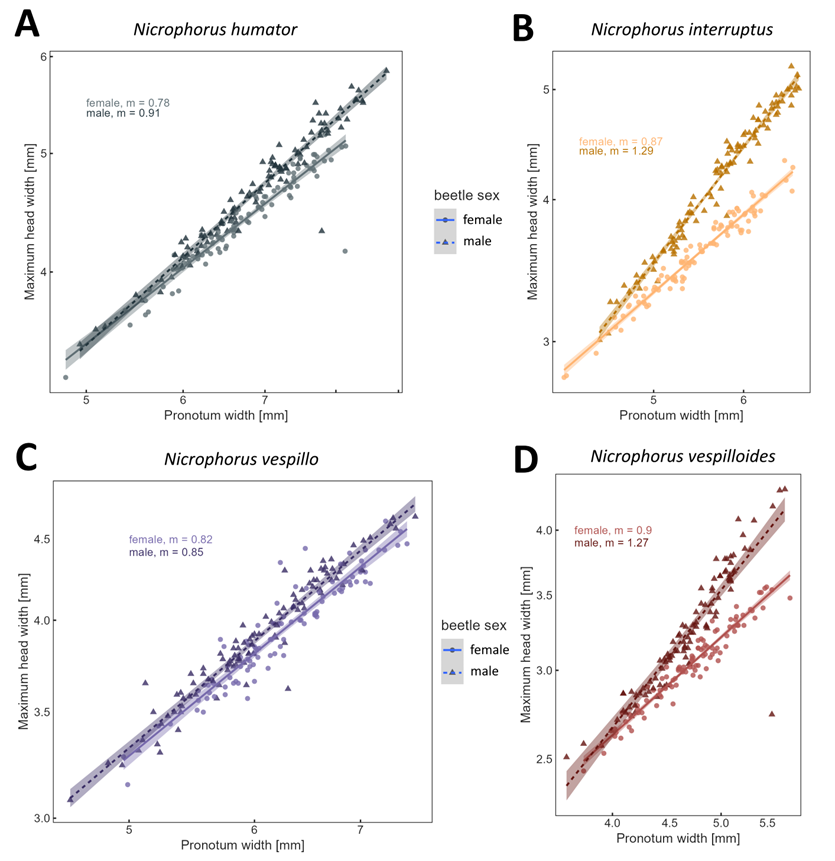
**

**Fig. S5.** Graphical presentation of statistical analyses related to the allometry of maximum head width and pronotum width in the tested burying beetle species. Lines represent ordinary least squares regression models based on log–log transformed data, with 95% confidence intervals. Sex‑specific slope values for the two variables tested are shown in the upper or lower corner of each graph. Solid lines with circles represent females, and dashed lines with triangles represent males.

**Table S6.** Linear model summary for the relationship between postocular area and pronotum width across four *Nicrophorus* species, including sex differences. *** *p* < 0.001, ** *p* < 0.01, * *p* < 0.05. F – females, M – males.

|  |  |  |  |  |  |  |  |  |  |
| --- | --- | --- | --- | --- | --- | --- | --- | --- | --- |
|  |  |  |  |  |  |  |  |  |  |
|  |  | **Term** | **Estimate** | **Std. Error** | **t value** | ***p* value** | **Significance** |  |  |
|  |  | **postocular area vs pronotum width** |  |  |  |  |  |  |  |
|  |  | (Intercept) | -2,900 | 0,167 | -17,341 | 0,000 | *** |  |  |
|  |  | `log_pronotum width` (*Nicrophorus humator* F) | 0,967 | 0,088 | 11,026 | 0,000 | *** |  |  |
|  |  | species*Nicrophorus interruptus* F | 0,081 | 0,233 | 0,349 | 0,727 |  |  |  |
|  |  | species*Nicrophorus vespillo* F | 0,989 | 0,255 | 3,883 | 0,000 | ** |  |  |
|  |  | species*Nicrophorus vespilloides F* | 0,381 | 0,231 | 1,647 | 0,100 |  |  |  |
|  |  | `beetle sex`M | -1,405 | 0,224 | -6,277 | 0,000 | *** |  |  |
|  |  | `log_pronotum width`:species*Nicrophorus interruptus* F | 0,274 | 0,130 | 2,111 | 0,035 | * |  |  |
|  |  | `log_pronotum width`:species*Nicrophorus vespillo* F | -0,121 | 0,137 | -0,887 | 0,375 |  |  |  |
|  |  | `log_pronotum width`:species*Nicrophorus vespilloides* F | 0,240 | 0,135 | 1,776 | 0,076 |  |  |  |
|  |  | `log_pronotum width`:`beetle sex`M | 0,906 | 0,117 | 7,758 | 0,000 | *** |  |  |
|  |  | species*Nicrophorus interruptus*:`beetle sex`M | 0,365 | 0,318 | 1,148 | 0,251 |  |  |  |
|  |  | species*Nicrophorus vespillo*:`beetle sex`M | 1,116 | 0,337 | 3,309 | 0,001 | ** |  |  |
|  |  | species*Nicrophorus vespilloide*s:`beetle sex`M | 0,178 | 0,319 | 0,558 | 0,577 |  |  |  |
|  |  | `log_pronotum width`:species*Nicrophorus interruptus*:`beetle sex`M | -0,040 | 0,176 | -0,226 | 0,821 |  |  |  |
|  |  | `log_pronotum width`:species*Nicrophorus vespillo*:`beetle sex`M | -0,660 | 0,181 | -3,638 | 0,000 | ** |  |  |
|  |  | `log_pronotum width`:species*Nicrophorus vespilloides*:`beetle sex`M | 0,123 | 0,188 | 0,653 | 0,514 |  |  |  |
|  |  |  |  |  |  |  |  |  |  |
|  |  |  |  |  |  |  |  |  |  |

**Table S7.** Summary of the linear regression model estimating the effect of interocular distance and pronotum width width across four *Nicrophorus* species, including sex differences, *** *p* < 0.001, ** *p* < 0.01, * *p* < 0.05. F – females, M – males.

|  |  |  |  |  |  |  |  |  |  |
| --- | --- | --- | --- | --- | --- | --- | --- | --- | --- |
|  |  |  |  |  |  |  |  |  |  |
|  |  | **Term** | **Estimate** | **Std. Error** | **t value** | ***p* value** | **Significance** |  |  |
|  |  | **interocular distance vs pronotum width** |  |  |  |  |  |  |  |
|  |  | (Intercept) | -0,667 | 0,064 | -10,416 | 0,000 | *** |  |  |
|  |  | `log_pronotum width` (*Nicrophorus humator* F) | 0,723 | 0,034 | 21,538 | 0,000 | *** |  |  |
|  |  | species*Nicrophorus interruptus* F | 0,053 | 0,089 | 0,594 | 0,552 |  |  |  |
|  |  | species*Nicrophorus vespillo* F | 0,237 | 0,097 | 2,432 | 0,015 | * |  |  |
|  |  | species*Nicrophorus vespilloides* F | -0,157 | 0,089 | -1,777 | 0,076 | . |  |  |
|  |  | `beetle sex`M | -0,434 | 0,086 | -5,060 | 0,000 | *** |  |  |
|  |  | `log_pronotum width`:species*Nicrophorus interruptus* F | 0,065 | 0,050 | 1,312 | 0,190 |  |  |  |
|  |  | `log_pronotum width`:species*Nicrophorus vespillo* F | -0,038 | 0,052 | -0,728 | 0,467 |  |  |  |
|  |  | `log_pronotum width`:species*Nicrophorus vespilloides* F | 0,180 | 0,052 | 3,470 | 0,001 | ** |  |  |
|  |  | `log_pronotum width`:`beetle sex`M (*Nicrophorus humator* M) | 0,261 | 0,045 | 5,839 | 0,000 | *** |  |  |
|  |  | species*Nicrophorus interruptus*:`beetle sex`M | -0,057 | 0,122 | -0,468 | 0,640 |  |  |  |
|  |  | species*Nicrophorus vespillo*:`beetle sex`M | 0,317 | 0,129 | 2,457 | 0,014 | * |  |  |
|  |  | species*Nicrophorus vespilloides*:`beetle sex`M | -0,012 | 0,122 | -0,102 | 0,919 |  |  |  |
|  |  | `log_pronotum width`:species*Nicrophorus interruptus:*`beetle sex`M | 0,087 | 0,067 | 1,293 | 0,197 |  |  |  |
|  |  | `log_pronotum width`:species*Nicrophorus vespillo*:`beetle sex`M | -0,177 | 0,069 | -2,552 | 0,011 | * |  |  |
|  |  | `log_pronotum width`:species*Nicrophorus vespilloides*:`beetle sex`M | 0,092 | 0,072 | 1,277 | 0,202 |  |  |  |
|  |  |  |  |  |  |  |  |  |  |
|  |  |  |  |  |  |  |  |  |  |
